# Supplementary material
Source: PubMed Central journal article supplement (PMC8580811)
Supplement: mmc1.pdf [file mmc1.pdf]

**Appendix**  
**Modeling COVID-19 Mortality Across 44 Countries: Face Covering May Reduce Deaths**  
**Motallebi et al.**

**Appendix 1.** Extended Timeline of Non-Pharmaceutical Interventions (NPI) in Mask and No-Mask Countries During the Time of the Study<sup>1-70</sup>

| Country                                | Face coverage |            |        | Restriction of movement |        |                    |        | Social distancing |           |                  |        |                          |        |        |
|----------------------------------------|---------------|------------|--------|-------------------------|--------|--------------------|--------|-------------------|-----------|------------------|--------|--------------------------|--------|--------|
|                                        | Mask          | Quarantine |        | Home stay               |        | Travel restriction |        | Schools' closure  |           | Business closure |        | Restriction of gathering |        |        |
|                                        | Applied       | Applied    | Lifted | Applied                 | Lifted | Applied            | Lifted | Applied           | Lifted    | Applied          | Lifted | Applied                  | Lifted |        |
| a. Countries with national mask policy |               |            |        |                         |        |                    |        |                   |           |                  |        |                          |        |        |
| Austria                                | 14-Apr        | 13-Mar     |        | 16-Mar                  |        | 16-Mar             |        |                   |           |                  | 14-Apr |                          | 14-Apr |        |
| Bahrain                                | 9-Apr         | 22-Mar     |        | 22-Mar                  |        | 22-Mar             |        | 22-Mar            |           | 22-Mar           |        | 22-Mar                   |        | 22-Mar |
| Cyprus                                 | 1-May         | 30-Apr     | 21-May | 30-Apr                  | 21-May | 30-Apr             | 9-Jun  | 30-Apr            | 21-May    | 30-Apr           | 21-May |                          |        |        |
| Czech                                  | 12-Mar        | 16-Mar     | 24-Apr | 16-Mar                  | 11-May | 12-Mar             | 11-May | 14-Mar            | 11-May    | 14-Mar           | 11-May | 14-Mar                   | 11-May |        |
| Estonia                                | 1-May         | 13-Mar     | 17-May | 13-Mar                  | 17-May | 13-Mar             | 17-May | 13-Mar            | 17-May    | 13-Mar           | 17-May | 13-Mar                   | 17-May |        |
| Germany                                | 27-Apr        | 22-Mar     |        | 22-Mar                  |        | 15-Mar             |        | 13-Mar            |           | 22-Mar           |        | 22-Mar                   |        |        |
| Greece                                 | 4-May         | 22-Mar     | 4-May  | 22-Mar                  | 4-May  | 22-Mar             | 4-May  | 13-Mar            | 4-May     | 16-Mar           | 4-May  | 27-Feb                   | 4-May  |        |
| Hong Kong                              | 16-Mar        | 5-Feb      |        |                         |        | 19-Mar             |        | 31-Jan            | 27-May    |                  |        | 29-Mar                   |        |        |
| Iceland                                | 24-Mar        | 1-Mar      |        | 1-Mar                   |        | 1-Mar              |        | 13-Mar            |           | 24-Mar           |        | 16-Mar                   |        |        |
| Ireland                                | 5-May         | 12-Mar     | 30-May | 12-Mar                  | 30-May | 12-Mar             | 30-May | 12-Mar            | 30-May    | 24-Mar           | 29-Jun |                          |        |        |
| Hungary                                | 27-Apr        | 16-Mar     |        | 13-Mar                  |        | 13-Mar             |        |                   |           |                  |        | 16-Mar                   |        |        |
| Israel                                 | 12-Apr        | 14-Apr     | 4-Apr  | 16-Apr                  |        | 26-Feb             |        | 12-Mar            | 19-May    | 16-Mar           | 27-May | 15-Mar                   |        |        |
| Japan                                  | 1-Mar         | 7-Apr      | 25-May | 30-Mar                  | 25-May | 7-Feb              | 25-May | 2-Mar             | 25-May    | 10-Apr           | 25-May | 30-Mar                   | 25-May |        |
| South Korea                            | 15-Feb        | 20-Feb     | 22-Apr | 20-Feb                  | 22-Apr | 24-Feb             | 22-Apr |                   |           | 20-Feb           | 22-Apr |                          |        |        |
| Latvia                                 | 2-Mar         | 13-Mar     |        | 13-Mar                  | 15-Jul | 13-Mar             | 15-Jul | 13-Mar            | 15-Jul    | 13-Mar           | 15-Jul | 13-Mar                   | 13-Jul |        |
| Lithuania                              | 13-Apr        | 16-Mar     | 11-May | 16-Mar                  | 1-Jul  | 16-Mar             | 1-Jul  | 16-Mar            | 1-Jul     | 25-Mar           | 1-Jul  | 16-Mar                   | 1-Jul  |        |
| Luxembourg                             | 20-Apr        | 15-Mar     |        | 15-Mar                  |        | 15-Mar             |        | 15-Mar            |           | 15-Mar           |        | 15-Mar                   |        |        |
| Malta                                  | 1-May         | 25-Feb     |        | 7-Apr                   |        | 12-Mar             |        | 12-Mar            |           | 22-Mar           |        | 12-Mar                   |        |        |
| Oman                                   | 29-Apr        | 10-Apr     | 3-Jul  | 10-Apr                  | 3-Jul  | 10-Apr             | 3-Jul  | 10-Apr            | 3-Jul     | 10-Apr           | 3-Jul  | 10-Apr                   | 3-Jul  |        |
| Poland                                 | 15-Apr        | 12-Mar     | 3-May  | 12-Mar                  | 3-May  | 12-Mar             | 3-May  | 12-Mar            | 3-May     | 12-Mar           | 3-May  | 10-Mar                   | 20-Apr |        |
| Portugal                               | 18-Apr        | 18-Mar     | 18-May | 25-Mar                  | 18-May | 25-Mar             | 18-May | 25-Mar            | 18-May    | 25-Mar           | 18-May | 25-Mar                   | 18-May |        |
| Qatar                                  | 26-Apr        | 9-Mar      | 15-Jun | 9-Mar                   | 15-Jul | 9-Mar              | 15-Jul | 9-Mar             | 1-Sep     | 9-Mar            | 1-Aug  | 9-Mar                    | 1-Aug  |        |
| Russia                                 | 7-Feb         | 2-Mar      |        | 30-Mar                  | 22-Jun | 15-Feb             | 22-Jun | 2-Mar             | 22-Jun    | 2-Mar            | 22-Jun | 2-Mar                    | 22-Jun |        |
| Singapore                              | 14-Apr        | 7-Apr      | 2-Jun  | 7-Apr                   | 2-Jun  | 7-Apr              | 2-Jun  | 7-Apr             | 31-Dec-21 | 7-Apr            | 2-Jun  | 7-Apr                    | 2-Jun  |        |
| Slovakia                               | 25-Mar        | 13-Mar     |        | 13-Mar                  | 22-Apr | 13-Mar             | 22-May | 8-Mar             | 1-Sep     | 16-Mar           | 6-May  | 10-Mar                   | 22-May |        |

**Appendix**  
**Modeling COVID-19 Mortality Across 44 Countries: Face Covering May Reduce Deaths**  
**Motallebi et al.**

|                      |        |        |        |        |        |        |        |        |        |        |        |        |        |
|----------------------|--------|--------|--------|--------|--------|--------|--------|--------|--------|--------|--------|--------|--------|
| Slovenia             | 29-Mar | 10-Mar | 15-May | 10-Mar | 15-May | 10-Mar | 15-May | 10-Mar |        | 10-Mar | 15-May | 10-Mar | 15-May |
| United Arab Emirates | 27-Mar | 26-Mar | 15-Apr | 26-Mar | 26-Apr | 26-Mar | 30-Dec | 3-Mar  | 30-Jun | 23-Mar | 1-Sep  | 18-Mar | 1-Sep  |

| Country                                | Face coverage |            | Restriction of movement |                    |                  |                  | Social distancing        |         |        |         |        |        |        |
|----------------------------------------|---------------|------------|-------------------------|--------------------|------------------|------------------|--------------------------|---------|--------|---------|--------|--------|--------|
|                                        | Mask          | Quarantine | Home stay               | Travel restriction | Schools' closure | Business closure | Restriction of gathering |         |        |         |        |        |        |
|                                        | Applied       | Applied    | Lifted                  | Applied            | Lifted           | Applied          | Lifted                   | Applied | Lifted | Applied | Lifted |        |        |
| Countries with no national mask policy |               |            |                         |                    |                  |                  |                          |         |        |         |        |        |        |
| Andorra                                |               | 16-Mar     |                         | 16-Mar             |                  | 16-Mar           |                          | 16-Mar  |        | 16-Mar  |        | 16-Mar |        |
| Belarus                                |               | 30-Mar     | 17-Apr                  | 30-Mar             | 17-Apr           | 30-Mar           | 17-Apr                   | 4-Apr   | 17-Apr | 30-Mar  | 17-Apr | 30-Mar | 17-Apr |
| Belgium                                |               | 12-Mar     | 4-May                   | 12-Mar             | 4-May            | 12-Mar           | 4-May                    | 12-Mar  | 4-May  | 12-Mar  |        | 12-Mar |        |
| Brunei                                 |               | 15-Mar     | 23-May                  | 15-Mar             | 23-May           | 15-Mar           | 23-May                   | 15-Mar  | 2-Jun  | 16-Mar  | 23-May | 16-Mar | 23-May |
| Croatia                                |               | 22-Mar     | 22-May                  | 22-Mar             | 22-May           | 22-Mar           | 22-May                   | 22-Mar  | 1-Sep  | 22-Mar  | 22-May | 22-Mar | 5-Jul  |
| Denmark                                |               | 13-Mar     | 15-Apr                  | 13-Mar             | 15-Apr           | 13-Mar           | 15-Apr                   | 13-Mar  | 15-Aug | 13-Mar  | 15-Aug | 13-Mar | 15-Aug |
| Finland                                |               | 16-Mar     | 15-Apr                  | 16-Mar             | 15-Apr           | 16-Mar           | 15-Apr                   | 16-Mar  | 13-May | 16-Mar  | 1-Jun  | 16-Mar | 1-Jun  |
| France                                 |               | 16-Mar     | 11-May                  | 16-Mar             | 11-May           | 16-Mar           | 11-May                   | 16-Mar  | 11-May | 16-Mar  | 11-May | 16-Mar | 11-May |
| Italy                                  |               | 24-Feb     | 3-Jun                   | 8-Mar              | 3-Jun            | 31-Jan           | 3-Jun                    | 4-Mar   | 1-Sep  | 21-Mar  | 18-May | 23-Feb | 15-Jun |
| Liechtenstein                          |               | 16-Mar     |                         | 16-Mar             |                  | 16-Mar           |                          | 16-Mar  |        | 16-Mar  |        | 16-Mar |        |
| Netherlands                            |               | 12-Mar     | 20-May                  | 12-Mar             | 20-May           | 13-Mar           | 20-May                   | 12-Mar  | 1-Sep  | 12-Mar  | 20-May | 12-Mar | 15-Jun |
| Norway                                 |               | 12-Mar     |                         | 12-Mar             |                  | 13-Mar           |                          | 12-Mar  |        | 12-Mar  |        | 12-Mar |        |
| Saudi Arabia                           |               | 15-Mar     |                         | 15-Mar             |                  | 21-Mar           | 21-May                   | 15-Mar  |        | 15-Mar  |        | 15-Mar | 26-Jul |
| Spain                                  |               | 22-Mar     | 21-Jun                  | 22-Mar             | 21-Jun           | 22-Mar           | 21-Jun                   | 22-Mar  | 21-Jun | 28-Mar  | 12-Apr | 28-Mar | 12-Apr |
| Sweden                                 |               |            |                         | 16-Mar             | 15-Jun           | 18-Mar           | 15-Jun                   | 16-Mar  | 15-Jun |         |        | 11-Mar | 15-Jun |
| Switzerland                            |               | 16-Mar     | 27-Apr                  | 16-Mar             | 27-Apr           | 16-Mar           | 27-Apr                   | 16-Mar  |        | 16-Mar  | 27-Apr | 28-Feb |        |
| United Kingdom                         |               | 22-Mar     | 30-May                  | 22-Mar             | 30-May           | 22-Mar           | 15-Jun                   | 22-Mar  | 1-Sep  | 22-Mar  | 1-Sep  | 22-Mar | 1-Sep  |

**Appendix 2. Glossary of the United Nations Development Program (UNDP) - Human Development Index (HDI) and World Health Organization (WHO) - Health System Performance index**

**United Nations Development Program (UNDP) - Human Development Index (HDI)<sup>71</sup>**

The human development index (HDI) developed by the United Nations Development Program (UNDP), is a composite summary measure of country development status. In its calculation, each country's score is the average achievement of the country in 3 key dimensions of human development. These include (1) a long and healthy life; (2) being knowledgeable; (3) have a decent standard of living. The health dimension is assessed by life expectancy at birth, the education dimension is measured by mean of years of schooling for adults aged 25 years and more and expected years of schooling for children of school entering age. The standard of living dimension is measured by gross national income (GNI) per capita. The HDI uses the logarithm of income, to reflect the diminishing importance of income with increasing GNI. The scores for the 3 HDI dimension indices are then aggregated into a composite index using geometric mean with equal weights to the three dimensions.

**World Health Organization (WHO) - Health System Performance index<sup>72</sup>**

The Health System Performance index developed by the World Health Organization (WHO) is a composite summary measure of country health system performance. In its calculation, each country's score is the average achievement of the country in 5 key goals (dimensions) of health system performance. These include (1) health (outcomes) quality, (2) health (outcomes) equity, (3) (health systems) responsiveness quality, (4) (health systems) responsiveness equity, and (5) (health systems) fairness in financing. The Health System Performance index is a weighted average of the 5 component goals, where the first, second, and fifth goal are weighted at 0.25, and the third and fourth goals are weighted at 0.125. These weights are based on a survey carried out by WHO to elicit stated preferences of individuals in their relative valuations of the goals of the health system.

**Appendix 3. Fixed effect modeling**

While a linear mixed effect model is a suitable modeling technique for longitudinal data, one can also apply an one-way fixed effect model to assess similar behavior. The model we use here is as follows:

$$\ln(\text{Mortality Per Million})_{ij} = (\text{Country})_i + (\text{National Facemask Policy})_{ij} B_1 + (\text{Days})_{ij} B_2 + (\text{Days}^2)_{ij} B_3 + (\text{Monday})_{ij} B_4 + (\text{Quarantine Policy})_{ij} B_5 + [(\text{Group})_i \times (\text{Days})_{ij}] B_6 + [(\text{Group})_{ij} \times (\text{Days}^2)_{ij}] B_7 + [(\text{National Facemask Policy})_{ij} \times (\text{Days})_{ij}] B_8 + [(\text{National Facemask Policy})_{ij} \times (\text{Days}^2)_{ij}] B_9 + \epsilon_{ij}$$

where  $Country_i$  is the country level fixed effect. Note that this model is much simpler than the full model presented in the main manuscript. This is because an one-way fixed effect model is not able to estimate country level predictors (such as the social trust score), hence all country level predictors are omitted in this model. Ideally the country level fixed effect should adjust for these confounders. The estimated coefficients are presented in the following table.

**Appendix Table 3.** Estimated Coefficients for Fixed Effect Modeling

| <b>Parameter</b>                                                              | <b>Coefficient</b> | <b>SE</b> | <b>p-value</b> |
|-------------------------------------------------------------------------------|--------------------|-----------|----------------|
| National mask policy (yes vs no)                                              | 0.14               | 0.12      | 0.27           |
| Number of days since the first COVID-19 case                                  | 0.16               | <0.01     | <0.01          |
| Number of days since the first COVID-19 case (squared)                        | >-0.01             | <0.01     | <0.01          |
| Monday (yes vs no)                                                            | >-0.01             | <0.01     | 0.33           |
| National movement restriction (yes vs no)                                     | 0.29               | 0.02      | <0.01          |
| Group x days since the first COVID-19 case                                    | -0.06              | <0.01     | <0.01          |
| Group x days since the first COVID-19 case (squared)                          | <0.01              | <0.01     | <0.01          |
| National mask policy x number of days since the first COVID-19 case           | <0.01              | <0.01     | 0.31           |
| National mask policy x number of days since the first COVID-19 case (squared) | >-0.01             | <0.01     | <0.01          |

Comparing this table with Table 3, we can see that most of the coefficient estimates remain similar, indicating that the linear mixed model and fixed effect model coincide with each other. Performing a similar analysis as in the main manuscript, we can show that the countries without facemask policy have a daily average increase of 0.1576 – 0.0022(days since first case) log death per million, while countries with facemask policy have a daily average increase of 0.1056 – 0.0007(days since first case) log death per million. These results also confirm those shown in the main manuscript.

**Appendix 4.** Parallel trend assumption modeling

As discussed in the main manuscript, it is important to show that no pre-trend exists for such data set, which in-turn reveals the significance of the effect of intervention. One approach to verify this assumption involves fitting a dynamic event model,<sup>73</sup> and to show certain estimated coefficients are statistically insignificant. In particular, we define the variable  $K_{it}$ , called “relative time”, as the number of time points relative to the mask policy implementation for masked country  $i$ , i.e.  $K_{it} = t - E_i$ , where  $E_i$  is the time of mask implementation for masked country  $i$ . Note, this value will be negative for time points  $t$  prior to mask implementation, and positive otherwise. The dynamic event model takes the following form:

$$\begin{aligned} \ln(\text{Mortality Per Million})_{ij} = & B_0 + (\text{Days})_{ij} B_1 + (\text{Days}^2)_{ij} B_2 + (\text{Monday})_{ij} B_3 + (\text{Population} \\ & \text{Density})_i B_4 + (\text{Population over 65})_i B_5 + (\text{Urban Ratio})_i B_6 + (\text{Sex})_i B_7 + (\text{Quarantine Policy})_{ij} B_8 \\ & + (\text{Migrant Index})_i B_9 + (\text{Health Expenditure})_i B_{10} + (\text{ICU Beds})_i B_{11} + (\text{Hospital Beds})_i B_{12} + \\ & (\text{Social Trust})_i B_{13} + \sum_{k=-\infty}^{\infty} \gamma_k \mathbf{1}\{K_{it}=k\} + \mu_i + (\text{Days})_{ij} v_i + \epsilon_{ij} \end{aligned}$$

In the model above,  $\mathbf{1}\{.\}$  denotes the indicator function, where  $\mathbf{1}\{.\} = 1$  if the expression within is satisfied, and 0 otherwise. Pre-trend data will have  $k < 0$ , while data after mask policy implementation will have  $k \geq 0$ . Note this mixed effect model is similar to the main model presented in the manuscript.

We chose to model the dynamic effects using a similar structure since a mixed effect model fits the data better, and adjusting for different variables can help eliminate potential confounders, so the  $\gamma$  coefficients can estimate any existing pre-trend and post-trend. In order to show that pre-trend doesn't exist in the data, one needs to show all  $\gamma_k$  are statistically insignificant for  $k < 0$ , which indicates that countries with mask implementation do not have additional confounding factors unexplained by the model prior to mask implementation. One approach is verify this is to observe the  $p$ -values of  $\gamma_k$  for when  $k < 0$ . Below shows the boxplot for such  $p$ -values.

**Appendix Figure 4.** Boxplot of  $p$ -values  $\gamma_k$  for when  $k < 0$ .

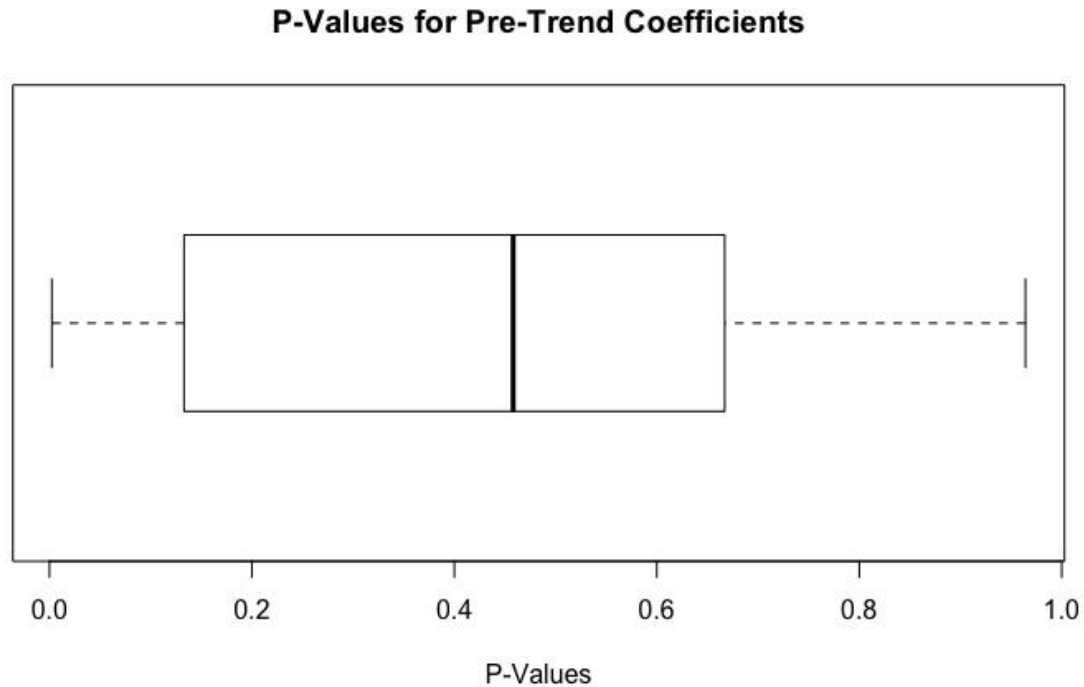

*Notes:* Observing the boxplot in Appendix Figure 4, one can see that a majority of the coefficients are statistically insignificant (with  $p$ -value greater than 0.05). Out of 55 pre-trend coefficients, only 9 showed statistical significance. Deeper examination at these 9 coefficients reveals that all are at time periods  $-34$  and earlier, indicating these coefficients capture the relative times at least 34 days prior to mask implementation. Provided only a few countries have relative times of  $-34$  days and earlier, these estimated coefficients are less stable and hence can potentially be affected by random noise. Based on this analysis, we can confirm that no pre-trend exists in this data set, hence showing the significance of mask policy implementation.

**Appendix**  
**Modeling COVID-19 Mortality Across 44 Countries: Face Covering May Reduce Deaths**  
**Motallebi et al.**

**Appendix 5. Investigation of non-pharmaceutical interventions**

While we have demonstrated the association between facemask policy and mortality, it can be argued that other non-pharmaceutical interventions have also played a role in controlling the mortality rate. According to Appendix Table 1 above, there are potentially 6 other interventions in placed during our period of study, such as quarantine, home stay, schools' closure, etc. To demonstrate the association of facemask policy remains in the presences of other interventions, individual models were fitted that include an additional time variable to control for the duration of each restriction policy. Below shows the modeling results for each of the 6 policies. Given our main focus concerns the variables that involve mask policy, groupings, and days into the pandemic, only a subset of estimated coefficients are presented.

**Appendix Table 5.** Estimated Coefficients (and *p*-values) for Models With Duration of Individual Intervention Policies

| <b>Parameter</b>                                                              | <b>Quarantine</b>       | <b>Home stay</b>        | <b>Travel restriction</b> | <b>Schools' closure</b> | <b>Business closure</b> | <b>Restriction of gathering</b> |
|-------------------------------------------------------------------------------|-------------------------|-------------------------|---------------------------|-------------------------|-------------------------|---------------------------------|
| Group (mask vs no mask)                                                       | 1.08<br>(0.02)          | 1.09<br>(0.01)          | 1.00<br>(0.02)            | 1.00<br>(0.03)          | 1.23<br>(0.01)          | 1.02<br>(0.03)                  |
| National mask policy (yes vs no)                                              | 0.39<br>(0.02)          | 0.40<br>(0.01)          | 0.40<br>(0.01)            | 0.43<br>(0.01)          | 0.38<br>(0.01)          | 0.38<br>(0.01)                  |
| Number of days since the first COVID-19 case                                  | 0.13<br>( $<0.01$ )     | 0.13<br>( $<0.01$ )     | 0.13<br>( $<0.01$ )       | 0.13<br>( $<0.01$ )     | 0.15<br>( $<0.01$ )     | 0.14<br>( $<0.01$ )             |
| Number of days since the first COVID-19 case (squared)                        | $>-0.01$<br>( $<0.01$ ) | $>-0.01$<br>( $<0.01$ ) | $>-0.01$<br>( $<0.01$ )   | $>-0.01$<br>( $<0.01$ ) | $>-0.01$<br>( $<0.01$ ) | $>-0.01$<br>( $<0.01$ )         |
| Duration of policy                                                            | 0.04<br>( $<0.01$ )     | 0.04<br>( $<0.01$ )     | 0.04<br>( $<0.01$ )       | 0.04<br>( $<0.01$ )     | 0.02<br>( $<0.01$ )     | 0.03<br>( $<0.01$ )             |
| Group x days since the first COVID-19 case                                    | -0.05<br>( $<0.01$ )    | -0.05<br>( $<0.01$ )    | -0.05<br>( $<0.01$ )      | -0.06<br>( $<0.01$ )    | -0.05<br>( $<0.01$ )    | -0.05<br>( $<0.01$ )            |
| Group x days since the first COVID-19 case (squared)                          | $<0.01$<br>( $<0.01$ )  | $<0.01$<br>( $<0.01$ )  | $<0.01$<br>( $<0.01$ )    | $<0.01$<br>( $<0.01$ )  | $<0.01$<br>( $<0.01$ )  | $<0.01$<br>( $<0.01$ )          |
| National mask policy x number of days since the first COVID-19 case           | -0.01<br>( $<0.01$ )    | -0.01<br>( $<0.01$ )    | -0.01<br>( $<0.01$ )      | -0.01<br>( $<0.01$ )    | -0.01<br>( $<0.01$ )    | -0.01<br>( $<0.01$ )            |
| National mask policy x number of days since the first COVID-19 case (squared) | $<0.01$<br>(0.04)       | $<0.01$<br>(0.03)       | $<0.01$<br>(0.03)         | $<0.01$<br>(0.01)       | $<0.01$<br>(0.05)       | $<0.01$<br>(0.05)               |

The above Appendix Table 5, reveals the estimated coefficients are similar to those presented in Table 3 from the manuscript. This indicates that the association between facial mask policy and COVID-19 mortality is not changed by the presences of other non-pharmaceutical interventions. Moreover, when including all 6 policies into the model, the results remain similar.

**Appendix**  
**Modeling COVID-19 Mortality Across 44 Countries: Face Covering May Reduce Deaths**  
**Motallebi et al.**

**References of Appendix**

1. Basile C, Combe C, Pizzarelli F, Covic A, Davenport A, Kanbay M, et al. Recommendations for the prevention, mitigation and containment of the emerging SARS-CoV-2 (COVID-19) pandemic in haemodialysis centres. *Nephrol Dial Transplant* 2020;35(5):737-741.
2. Brussow H. COVID-19: test, trace and isolate-new epidemiological data. *Environ Microbiol* 2020;22(7):2445-2456.
3. Contini C, Caselli E, Martini F, Maritati M, Torreggiani E, Seraceni S, et al. COVID-19 Is a Multifaceted Challenging Pandemic Which Needs Urgent Public Health Interventions. *Microorganisms* 2020;8(8).
4. Davenne E, Giot JB, Huynen P. [Coronavirus and COVID-19 : focus on a galloping pandemic]. *Rev Med Liege* 2020;75(4):218-225.
5. De Georgeo MR, De Georgeo JM, Egan TM, Klee KP, Schwemm MS, Bye-Kollbaum H, et al. Containing SARS-CoV-2 in hospitals facing finite PPE, limited testing, and physical space variability: Navigating resource constrained enhanced traffic control bundling. *J Microbiol Immunol Infect* 2021;54(1):4-11.
6. Despres C, Aguilar R, McAlister A, Ramirez AG. Communication for Awareness and Action on Inequitable Impacts of COVID-19 on Latinos. *Health Promot Pract* 2020;21(6):859-861.
7. Ferretti L, Wymant C, Kendall M, Zhao L, Nurtay A, Abeler-Dorner L, et al. Quantifying SARS-CoV-2 transmission suggests epidemic control with digital contact tracing. *Science* 2020;368(6491).
8. Hasanoglu I, Bilgic Z, Olcucuoglu E, Karakan MS, Demirci BG, Kalem AK, et al. Do Lifestyle Changes of Renal Transplant Recipients During the Pandemic Reduce the Risk of Coronavirus Disease 2019? *Transplant Proc* 2020;52(9):2667-2670.
9. Krishan K, Kanchan T. Lockdown is an effective 'vaccine' against COVID-19: A message from India. *J Infect Dev Ctries* 2020;14(6):545-546.
10. Lai CC, Wang CY, Wang YH, Hsueh SC, Ko WC, Hsueh PR. Global epidemiology of coronavirus disease 2019 (COVID-19): disease incidence, daily cumulative index, mortality, and their association with country healthcare resources and economic status. *Int J Antimicrob Agents* 2020;55(4):105946.
11. Lai S, Ruktanonchai NW, Zhou L, Prosper O, Luo W, Floyd JR, et al. Effect of non-pharmaceutical interventions to contain COVID-19 in China. *Nature* 2020;585(7825):410-413.
12. Lai S, Ruktanonchai NW, Zhou L, Prosper O, Luo W, Floyd JR, et al. Effect of non-pharmaceutical interventions for containing the COVID-19 outbreak in China. *medRxiv* 2020.
13. Morawska L, Tang JW, Bahnfleth W, Bluysen PM, Boerstra A, Buonanno G, et al. How can airborne transmission of COVID-19 indoors be minimised? *Environ Int* 2020;142:105832.
14. Ngai CSB, Singh RG, Lu W, Koon AC. Grappling With the COVID-19 Health Crisis: Content Analysis of Communication Strategies and Their Effects on Public Engagement on Social Media. *J Med Internet Res* 2020;22(8):e21360.
15. Ngonghala CN, Iboi E, Eikenberry S, Scotch M, MacIntyre CR, Bonds MH, et al. Mathematical assessment of the impact of non-pharmaceutical interventions on curtailing the 2019 novel Coronavirus. *Math Biosci* 2020;325:108364.
16. Official government website for accurate verified information on Coronavirus GoroC. Available from: <https://www.koronavirus.hr/en>
17. Official website of Center for Disease Control Prevention of USA on Coronavirus. Available from: <https://www.cdc.gov/coronavirus/2019-ncov/index.html>



**Appendix**  
**Modeling COVID-19 Mortality Across 44 Countries: Face Covering May Reduce Deaths**  
**Motallebi et al.**

18. Official website of Danish Health Authority on Coronavirus/COVID-19. Available from: <https://www.sst.dk/en/english/corona-eng>
19. Official website of Department of Health of Hong Kong on Coronavirus. Available from: <https://www.coronavirus.gov.hk/eng/index.html>
20. Official website of Federal Ministry for Social Affairs H, Care and Consumer of Austria. Available from: [www.sozialministerium.at/covid](http://www.sozialministerium.at/covid)
21. Official website of Federal office of Public Health of Switzerland on Coronavirus. Available from: <https://www.bag.admin.ch/bag/en/home/krankheiten/ausbrueche-epidemien-pandemien/aktuelle-ausbrueche-epidemien/novel-cov.html>
22. Official website of government of Belgium on Coronavirus. Available from: <https://www.info-coronavirus.be/>
23. Official website of Government of Hungary on Coronavirus. Available from: <http://abouthungary.hu/news-in-brief/coronavirus-heres-the-latest/>
24. Official website of Government of Iceland on Coronavirus. Available from: <https://www.government.is/government/covid-19/>
25. Official website of Government of Israel on Coronavirus. Available from: <https://govextra.gov.il/ministry-of-health/corona/corona-virus-en/>
26. Official website of Government of Latvia on Coronavirus. Available from: <https://covid19.gov.lv/>
27. Official website of Government of Lithuania on Coronavirus. Available from: <https://koronastop.lrv.lt/en/>
28. Official website of Government of Luxemburg on Coronavirus. Available from: [https://gouvernement.lu/fr/dossiers.gouv\\_msan+fr+dossiers+2020+corona-virus.html](https://gouvernement.lu/fr/dossiers.gouv_msan+fr+dossiers+2020+corona-virus.html)
29. Official website of Government of New Zealand on Coronavirus. Available from: <https://covid19.govt.nz/>
30. Official website of Government of Republic of Poland on Coronavirus. Available from: <https://www.gov.pl/web/coronavirus>
31. Official website of Government of Slovakia on Coronavirus. Available from: <https://korona.gov.sk/>
32. Official website of Government of Slovenia on Coronavirus. Available from: <https://www.gov.si/teme/koronavirus/>
33. Official website of Ministry of Health L, Welfare of Japan on Coronavirus. Available from: <https://www.mhlw.go.jp/english/>
34. Official website of Ministry of Health of Brunei. Available from: <http://www.moh.gov.bn/>
35. Official website of Ministry of health of Cyprus. Available from: <https://www.moh.gov.cy/moh/moh.nsf/All/0D5A0919CACA4BF8C225851B003E098C>
36. Official website of Ministry of health of Czech Republic. Available from: <http://onemocneni-aktualne.mzcr.cz/covid-19>
37. Official website of Ministry of Health of Ireland on Coronavirus. Available from: <https://www.gov.ie/en/news/7e0924-latest-updates-on-covid-19-coronavirus/>
38. Official website of Ministry of Health of Italy on Coronavirus. Available from: <http://www.salute.gov.it/nuovocoronavirus>
39. Official website of Ministry of Health of Kingdom of Bahrain. Available from: <https://www.moh.gov.bh/?lang=en>

**Appendix**  
**Modeling COVID-19 Mortality Across 44 Countries: Face Covering May Reduce Deaths**  
**Motallebi et al.**

40. Official website of Ministry of Health of Malta on Coronavirus. Available from: <https://deputyprimeminister.gov.mt/en/health-promotion/covid-19/Pages/landing-page.aspx>
41. Official website of Ministry of Health of Qatar on Coronavirus. Available from: <https://www.moph.gov.qa/english/Pages/Coronavirus2019.aspx/>
42. Official website of Ministry of health of Republic of Estonia IaCdC-. Available from: <https://www.terviseamet.ee/en/covid19>
43. Official website of Ministry of health of Republic of France on Coronavirus. Available from: <https://www.gouvernement.fr/en/coronavirus-covid-19>
44. Official website of Ministry of health of Republic of Germany on Coronavirus. Available from: <https://www.zusammengegegencorona.de/en/>
45. Official website of Ministry of health of Republic of Greece on Coronavirus. Available from: <https://covid19.gov.gr/covid19-live-analytics/>
46. Official website of Ministry of Health of Republic of Korea on Coronavirus. Available from: <http://ncov.mohw.go.kr/en/>
47. Official website of Ministry of Health of Russian Federation on Coronavirus. Available from: <https://minzdrav.gov.ru/en>
48. Official website of Ministry of Health of Singapore on Coronavirus. Available from: <https://www.moh.gov.sg/covid-19>
49. Official website of Ministry of Health of Spain on Coronavirus. Available from: <https://www.mschs.gob.es/en/home.htm>
50. Official website of Ministry of Health of Sultanate of Oman. Available from: <https://www.moh.gov.om/en/corona>
51. Official website of Ministry of Health of UK on Coronavirus. Available from: <https://www.gov.uk/guidance/coronavirus-covid-19-information-for-the-public>
52. Official website of Ministry of Health Welfare Sport of Netherlands on Coronavirus. Available from: <https://www.rivm.nl/coronavirus-covid-19/actueel>
53. Official website of Norwegian Institute of Public Health on Coronavirus. Available from: <https://www.fhi.no/en/id/infectious-diseases/coronavirus/daily-reports/daily-reports-COVID19/>
54. Official website of Swedish institute of Public Health on Coronavirus. Available from: <https://www.folkhalsomyndigheten.se/smittskydd-beredskap/utbrott/aktuella-utbrott/covid-19/>
55. Official website of Taiwan center of disease control. Available from: <https://www.cdc.gov.tw/En>
56. Official website of The supreme council for national security of United Arab Emirates. Available from: <https://covid19.ncema.gov.ae/en>
57. Official website of World Health Organization. Available from: <https://www.who.int/emergencies/diseases/novel-coronavirus-2019>
58. prevention OwoScod, control. Available from: <https://covid19.cdc.gov.sa/>
59. Raveendran AV, Jayadevan R. Reverse quarantine and COVID-19. *Diabetes Metab Syndr* 2020;14(5):1323-1325.
60. Salathe M, Althaus CL, Neher R, Stringhini S, Hodcroft E, Fellay J, et al. COVID-19 epidemic in Switzerland: on the importance of testing, contact tracing and isolation. *Swiss Med Wkly* 2020;150:w20225.
61. Shi XM. [The critical role of environmental health and disinfection in the prevention and control of COVID-19 pandemic]. *Zhonghua Yu Fang Yi Xue Za Zhi* 2020;54(9):918-922.
62. Teslya A, Pham TM, Godijk NG, Kretzschmar ME, Bootsma MCJ, Rozhnova G. Impact of self-imposed prevention measures and short-term government-imposed social distancing on

**Appendix**  
**Modeling COVID-19 Mortality Across 44 Countries: Face Covering May Reduce Deaths**  
**Motallebi et al.**

mitigating and delaying a COVID-19 epidemic: A modelling study. *PLoS Med* 2020;17(7):e1003166.

63. Wake RM, Morgan M, Choi J, Winn S. Reducing nosocomial transmission of COVID-19: implementation of a COVID-19 triage system. *Clin Med (Lond)* 2020;20(5):e141-e145.
64. Wang Q, Wang X, Lin H. The role of triage in the prevention and control of COVID-19. *Infect Control Hosp Epidemiol* 2020;41(7):772-776.
65. West R, Michie S, Rubin GJ, Amlot R. Applying principles of behaviour change to reduce SARS-CoV-2 transmission. *Nat Hum Behav* 2020;4(5):451-459.
66. Wiersinga WJ, Rhodes A, Cheng AC, Peacock SJ, Prescott HC. Pathophysiology, Transmission, Diagnosis, and Treatment of Coronavirus Disease 2019 (COVID-19): A Review. *JAMA* 2020;324(8):782-793.
67. Yen MY, Schwartz J, Chen SY, King CC, Yang GY, Hsueh PR. Interrupting COVID-19 transmission by implementing enhanced traffic control bundling: Implications for global prevention and control efforts. *J Microbiol Immunol Infect* 2020;53(3):377-380.
68. Yen MY, Schwartz J, King CC, Lee CM, Hsueh PR, Society of Taiwan Long-term Care Infection P, et al. Recommendations for protecting against and mitigating the COVID-19 pandemic in long-term care facilities. *J Microbiol Immunol Infect* 2020;53(3):447-453.
69. Yousuf H, Corbin J, Sweep G, Hofstra M, Scherder E, van Gorp E, et al. Association of a Public Health Campaign About Coronavirus Disease 2019 Promoted by News Media and a Social Influencer With Self-reported Personal Hygiene and Physical Distancing in the Netherlands. *JAMA Netw Open* 2020;3(7):e2014323.
70. Zhu CQ, Gao SD, Xu Y, Yang XH, Ye FQ, Ai LL, et al. A COVID-19 case report from asymptomatic contact: implication for contact isolation and incubation management. *Infect Dis Poverty* 2020;9(1):70.
71. United Nations Development Programme (UNDP). Human Development Index (HDI). 2019; Available from: <http://hdr.undp.org/en/content/human-development-index-hdi>
72. Ajay Tandon, Christopher JL Murray, Jeremy A Lauer, David B Evans. Measuring overall health system performance for 191 countries. GPE Discussion Paper Series: No. 30 EIP/GPE/EQC World Health Organization (WHO). [cited 2020 2 July 2020]; Available from: <https://www.who.int/healthinfo/paper30.pdf>
73. Borusyak K, Jaravel X. Revisiting Event Study Designs. May 8, 2017; Available from: SSRN: <https://ssrn.com/abstract=2826228> <http://dx.doi.org/10.2139/ssrn.2826228>
